# Supplementary material
Source: HighWire-hosted journal article supplement (https://www.cmajopen.ca/highwire/filestream/80862/field_highwire_adjunct_files/0/open-2014-0071-original-submission.pdf)
Supplement: open-2014-0071-original-submission.pdf [file open-2014-0071-original-submission.pdf]

1  
2  
3 Title:  
4

5  
6 Physicians and euthanasia: A Canadian print-media analysis of physician perspectives  
7

8 Authors:  
9

10  
11 David Kenneth Wright, PhD  
12 Postdoctoral Fellow, Biomedical Ethics Unit, Faculty of Medicine, McGill University  
13

14  
15 Jennifer R. Fishman, PhD  
16 Assistant Professor, Biomedical Ethics Unit, Faculty of Medicine, McGill University  
17

18  
19 Hadi Karsoho, BA  
20 Doctoral Candidate, Department of Sociology, McGill University  
21

22  
23 Sarah Sandham, MA  
24 Research Assistant, Faculty of Medicine, McGill University  
25

26  
27 Mary Ellen Macdonald, PhD  
28 Assistant Professor, Division of Oral Health and Society, Faculty of Dentistry, McGill University  
29

30  
31 Corresponding author:

32 Jennifer R. Fishman  
33 Biomedical Ethics Unit  
34 3647 Peel Street, Room 307  
35 Montreal, Quebec H3A 1X1  
36  
37

38 Funding statement:  
39

40  
41 This research was funded by an operating grant from the Canadian Institutes for Health  
42 Research.  
43  
44  
45  
46  
47  
48  
49  
50  
51  
52  
53  
54  
55  
56  
57  
58  
59  
60

## INTRODUCTION

Canadian society is on the verge of enacting change to the spectrum of medical practices legally provided at the end of life. Several recent events have mobilized public debate concerning the ethics of end-of-life care. The Supreme Court of Canada has agreed to hear the appeal of the case of *Carter v. Canada*, which, if decided in Carter et al.'s favor, would lift the current prohibitions on euthanasia and assisted suicide. Provincially, the Quebec National Assembly approved Bill 52 in June 2014, which will establish a permissive legal regime for 'medical aid-in-dying.' This concerted attention has arisen in response to significant changes in the social and political climate, and due to new biomedical understandings of the end-of-life. In turn, these events and others - in Canada and elsewhere - have further mobilized public debate concerning the ethics of end-of-life care.

Physicians, deeply implicated in and by these changes, represent an essential stakeholder group with respect to the ethics and practice of euthanasia and assisted suicide. Indeed, many Canadian physicians have purposively engaged with the media to voice their perspectives. Inversely, media sources often turn to physicians to provide authoritative and expert opinions on this matter. Physicians, in particular, are an authoritative stakeholder group, whose opinions can hold sway with the public and their public views about this issue may further reflect back upon the medical profession itself.

The objective of this study is to synthesize and analyze how physicians' perspectives appear in articles about euthanasia within the Canadian print-media. This analysis demonstrates how physicians are represented and therefore what the public

1  
2  
3 gleans about how physicians feel about euthanasia in Canada. While the perspectives of  
4  
5 those physicians who engage with the print media are unlikely to accurately represent  
6  
7 how physicians, individually or collectively, feel about euthanasia [1], the overall picture  
8  
9 presented to the media-consuming public reflects back onto attitudes about physicians  
10  
11 as a whole—influencing public perceptions of and trust in medical professionals during  
12  
13 these changing times. In this analysis, we do not aim to present our own understanding  
14  
15 or definition of euthanasia. Rather, our analysis shows that the *meaning* of euthanasia,  
16  
17 particularly vis-à-vis other end-of-life care practices, is itself a point of contention  
18  
19 amongst physicians in the media. Physicians’ perspectives, as portrayed by the media,  
20  
21 both encompass the broader discussions about euthanasia in Canada and, in turn,  
22  
23 influence the debate, which will have consequences for the moral landscape of medical  
24  
25 practice at the end-of-life.  
26  
27  
28  
29  
30  
31  
32

### 33 **METHODS**

34  
35  
36 This paper presents a discourse analysis of print media reporting on end-of-life  
37  
38 care. Discourse analysis is premised on the assumption that language (i.e., words, their  
39  
40 meanings and implied values) both reflects and shapes our reality [2]. We retrieved  
41  
42 English and French print-media articles published between 2008 and 2012 through a  
43  
44 systematic search of two large databases, Canadian Newsstand™ and Newscan.com.  
45  
46 Canadian Newsstand includes nearly 300 Canadian newspapers—national, provincial,  
47  
48 and local. We augmented this search with Newscan.com to capture French-language  
49  
50 newspapers, which are underrepresented in Canadian Newsstand. Search terms  
51  
52 included “euthanasia”, “physician-assisted suicide”, “withholding and withdrawal of  
53  
54  
55  
56  
57  
58  
59  
60

1  
2  
3 treatment”, “palliative sedation”, as well as related terms (e.g., “mercy killing”, “right to  
4  
5 die”, “withdrawal of care”). This yielded 1913 articles.  
6  
7

8  
9 For the analysis detailed here, we present a subset of our data focusing on  
10 representations of *physician perspectives*. To do so we culled the database to the 307  
11 articles that were either (1) authored by a physician or (2) referenced a physician  
12 perspective (i.e., an individual physician or professional medical association) within the  
13 article. Each of the articles was coded by members of the research team using AtlasTI™,  
14 a software program designed to sort and manage qualitative data. Coding at this initial  
15 stage was inductive and descriptive; each article was read line by line and initial codes  
16 were applied to facilitate the identification and categorization of topics portrayed in the  
17 media. A codebook was generated whereby each code was defined and then refined by  
18 team members during coding meetings to ensure team consensus.  
19  
20  
21  
22  
23  
24  
25  
26  
27  
28  
29  
30  
31  
32

33 These articles were read again by DKW alongside the initial coding schema.  
34 Coding at this stage was analytic; new codes were applied to identify patterns and  
35 themes with respect to how Canadian physicians are represented within media  
36 coverage about euthanasia. All authors participated in regular coding meetings about  
37 themes emerging and developed a categorization scheme of results. Finally, a portion of  
38 the dataset was re-read by two authors (DKW and HK) to verify the themes identified  
39 and ensure that nothing significant was omitted from the analysis.  
40  
41  
42  
43  
44  
45  
46  
47  
48  
49  
50

## 51 RESULTS

52  
53 Our analysis identifies three predominant discourses concerning physician  
54 perspectives on euthanasia: 1) contentions about integrating euthanasia within the  
55  
56  
57  
58  
59  
60

1  
2  
3 basic mission of medicine; 2) assertions about whether euthanasia can and should be  
4 distinguished from other end-of-life medical practices; 3) palliative care advocacy.  
5  
6

7  
8 Despite the recently updated CMA policy that proscribes euthanasia [3], physicians are  
9 represented in our media data as equivocal about the ethics of euthanasia, yet more  
10 likely to speak out against its legalization through one of these discourses.  
11  
12  
13  
14

### 15 **Demarcating the mission of medicine: euthanasia as care?**

16  
17 Many local, provincial, as well as national articles are devoted to coverage of the  
18 Quebec context, where in 2009 the Quebec College of Physicians adopted a position in  
19 favor of opening up a social discussion about euthanasia as a legitimate end-of-life care  
20 option [3]. Also in that year, media coverage began about membership surveys that  
21 were conducted amongst the Quebec Federation of Medical Specialists (QFMS) and the  
22 Quebec Federation of General Practitioners (QFGP), both of which purportedly  
23 established that the majority of physicians within these groups endorsed euthanasia as  
24 a potentially legitimate medical practice. Within this discourse of “physicians-in-favour”  
25 is the message that “death can be an appropriate type of care in certain circumstances”  
26 (Sherbrooke Record: November 4<sup>th</sup>, 2009) and that policy reform would align medical  
27 ethics with the will of the public, given repeated public opinion polls in Quebec and  
28 Canada that show high support for legalization of euthanasia.  
29  
30  
31  
32  
33  
34  
35  
36  
37  
38  
39  
40  
41  
42  
43  
44  
45  
46  
47

48 While the coverage of Quebec medical associations gives rise to an *overall*  
49 discourse of physicians-in-favour, a reading of individual physician perspectives  
50 challenges the interpretation of a unified supportive physician voice. Indeed, in our  
51 analysis of letters to the editor as well as quotations in news articles, most individual  
52  
53  
54  
55  
56  
57  
58  
59  
60

1  
2  
3 physicians in the media are positioned as *against* the view that euthanasia could ever  
4  
5 constitute ethical care. Reference is often made to medicine's basic mission as healing  
6  
7 and protecting life, and to euthanasia as fundamentally conflicting with this mission. For  
8  
9 example, one physician is quoted as saying, "we did not enter the field of medicine and  
10  
11 nursing to learn when to dispatch our patients when we or others are no longer able to  
12  
13 relieve their suffering" (The Gazette: August 17<sup>th</sup>, 2010), and another: "we've managed  
14  
15 to preserve the Hippocratic tradition for 2,400 years. I see respect for life as cultural old  
16  
17 growth forest. It's something we've fought hard to protect" (Kamploops Daily News:  
18  
19 March 16<sup>th</sup>, 2012). Further, several individual physicians engaged the media to challenge  
20  
21 the validity of the QFMS and QFGP surveys, citing low response rates and biased  
22  
23 questions, thereby questioning the conclusions that Quebec physicians support  
24  
25 euthanasia. These physicians caution the public that the Quebec medical associations  
26  
27 cannot be trusted to faithfully portray the perspectives of Canadian physicians as a  
28  
29 whole as they themselves feel falsely represented in the publicity of these surveys'  
30  
31 results.  
32  
33  
34  
35  
36  
37  
38  
39  
40

41 Physicians' arguments against legalizing euthanasia, as presented in the media,  
42  
43 explicitly seek to undermine the very logic of euthanasia *as care*. First, physicians  
44  
45 express a concern that euthanasia as medical therapy would irrevocably destabilize the  
46  
47 trust that society confers upon them as healers. For example, "We never want patients  
48  
49 to wonder whether their doctor will be trying to heal or trying to kill" (The Chilliwack  
50  
51 Progress: June 28<sup>th</sup>, 2012). Another argument is that the notion of desire for death is too  
52  
53 complex to be understood simply from a perspective of individual choice or freedom.  
54  
55  
56  
57  
58  
59  
60

1  
2  
3 Physicians making this argument suggest that their role compels them to never accept  
4  
5 at face value a patient's wish for a hastened death. Rather, their role as healer is to  
6  
7 understand and to respond to the motivations that underlie such a wish. For example,  
8  
9

10  
11 When a person says, 'I want to die'; it may simply mean, 'I feel useless.' When a  
12 person says, 'I don't want to be a burden'; it may really be a question, 'Am I a  
13 burden?' When someone says, 'I might as well be dead'; they may really be  
14 saying, 'No one cares about me'...(Victoria News: July 1<sup>st</sup>, 2011)  
15  
16

17 While in the minority, some individual physicians are represented in the media  
18  
19 as explicitly supportive of euthanasia. For example, within the discourse on the ethics of  
20  
21 care lies the concern that the illegality of euthanasia constrains the horizon of  
22  
23 therapeutic possibilities at the end of life. This constraint is portrayed as a limit to a  
24  
25 physician's ability to ethically attend to suffering:  
26  
27  
28

29  
30 I have had patients who begged me to put an end to their incredible suffering  
31 and meant it. I would have complied with their wish if the law had allowed me,  
32 but I had to say time and again that under the current law I would lose my  
33 license, get a criminal record and go to jail. All I could do was to ameliorate their  
34 suffering to the best of my ability and face every day how little that was (Maple  
35 Ridge News: June 22<sup>nd</sup> 2012).  
36  
37

38 Another common argument made against euthanasia is based in  
39  
40 consequentialist reasoning that the potential harms to society that may arise necessarily  
41  
42 outweigh any potential benefit to individual patients. While the Quebec medical  
43  
44 associations are represented as advocating euthanasia as a stringently safeguarded  
45  
46 practice, individual physicians argue that evidence from other jurisdictions that have  
47  
48 legalized euthanasia proves that the safeguards are not working. Further, these  
49  
50 physicians predict the most vulnerable within our society, (e.g., the elderly, the  
51  
52 disabled) would submit to covert social pressures to request euthanasia.  
53  
54  
55  
56  
57  
58  
59  
60

1  
2  
3 **Refining the terms of the debate: euthanasia as distinct from other end-of-life care**  
4  
5 **practices?**  
6  
7

8 In media representations about end-of-life care, specific medical practices (i.e.,  
9 euthanasia, the withholding or withdrawal of life-prolonging treatment, pain relief, and  
10 palliative sedation) are regularly equated as if one phenomenon. For example:  
11  
12  
13  
14

15  
16 Of course, the euthanasia elephant in every palliative-care centre is how  
17 accelerated death is a routine procedure, albeit labeled as withheld treatment or  
18 a painkilling medication overdose. More than 80% of the Quebec doctors in the  
19 aforementioned survey [QFMS] say some form of euthanasia is quietly practiced  
20 now (The National Post: October 15<sup>th</sup> 2009).  
21  
22

23 In this example, the journalist is reporting that the use of opioids and the withholding of  
24 life-prolonging treatment are conceptually equivalent to euthanasia. For many  
25 physicians in our data, depictions such as these are a source of frustration because they  
26 are conceptual conflations. These physicians contend that euthanasia is a distinct  
27 practice that must be ethically distinguished from practices of withholding and  
28 withdrawing life-sustaining treatment, administering opioids in proportion to patient  
29 suffering, and palliative sedation. The crux of the ethical difference, they suggest, is that  
30 only with euthanasia is the patient's death deliberately intended. Importantly, it is not  
31 only the lay public whom they accuse of committing such conflations, but also other  
32 physicians.  
33  
34  
35  
36  
37  
38  
39  
40  
41  
42  
43  
44  
45  
46  
47

48 We see examples of this conflation in the media's coverage of the physicians-in-  
49 favour discourse. Promoted by the Quebec medical associations discussed earlier is the  
50 idea that, currently, physicians are vulnerable to criminal prosecution in their attempts  
51 to deliver appropriate end-of-life care. For example,  
52  
53  
54  
55  
56  
57  
58  
59  
60



1  
2  
3 The change [to existing legislation] would protect doctors who withhold  
4 treatment or boost painkillers to end suffering and hasten the end, according to  
5 [a representative of the Quebec College of Physicians]. "Doctors do their best to  
6 give appropriate care, knowing it could sometimes be interpreted as a crime in  
7 the Criminal Code," [representative] said. "Appropriate care should not be  
8 defined as murder." (The Globe and Mail, November 4<sup>th</sup> 2009)  
9

10  
11  
12 However, delineating the practices discussed here from conventional definitions of  
13  
14 "euthanasia" is an important educational activity for other physicians engaging with  
15  
16 media. For example,  
17

18  
19  
20 ...much of what the pro-euthanasia camp wants, such as the right for withdrawal  
21 of treatment and the administration of pain medication that might hasten death,  
22 is actually already available to terminally ill patients in Canada (The Ottawa  
23 Citizen, July 17 2009).  
24

25  
26 This site of contention amongst physicians serves to contextualize this discourse of  
27  
28 physician vulnerability, and suggests a rationale for why many physicians feel compelled  
29  
30 to engage the media to clarify such conceptual understandings.  
31

### 32 33 **Palliative care advocacy** 34

35  
36 The representations of physicians identified as palliative care specialists within  
37  
38 the media collectively create a unified discourse. In this discourse, euthanasia is  
39  
40 opposed on the grounds that optimal end-of-life care obviates the need for deliberately  
41  
42 hastened death. Within this discourse are several distinct messages: 1) Advances in the  
43  
44 science of pain management mean patients need not fear a painful death; 2) When  
45  
46 suffering cannot be alleviated, palliative sedation is an ethically preferable last-resort  
47  
48 option; 3) The end of life is an important time filled with potentially meaningful  
49  
50 opportunities that are lost when death is deliberately hastened.  
51  
52  
53  
54  
55  
56  
57  
58  
59  
60

1  
2  
3 The palliative care discourse seeks to redirect the debate about euthanasia to a  
4 social discussion about how to improve access to and availability of quality end-of-life  
5 care for all Canadians. Palliative care physicians appear in the data as critical of the  
6 larger medical community for lacking basic competence in symptom management as  
7 well as in the supportive accompaniment of dying patients. They also appear as critical  
8 of the larger health care system for marginalizing palliative care. It is this marginalization,  
9 they suggest, which “pushes the debate toward euthanasia” (The Gazette: July 22<sup>nd</sup>,  
10 2009). In other words, they contend that if palliative care were a mainstream practice,  
11 euthanasia would not be required.  
12  
13  
14  
15  
16  
17  
18  
19  
20  
21  
22  
23  
24  
25

26 The messages conveyed by the palliative care discourse are uniform within our  
27 physician data, with two notable exceptions. For one retired palliative care physician  
28 and euthanasia advocate, palliative care is a values-based practice that should not be  
29 imposed on uninterested individuals. Another physician described her experience of  
30 caring for patients in a residential palliative care facility as confirming for her the  
31 importance of euthanasia as a necessary end-of-life care option:  
32  
33  
34  
35  
36  
37  
38  
39  
40

41 Most of our patients there died a ‘good death’: their symptoms well controlled,  
42 serene and not alone...But, despite all our expertise and resources, there were  
43 some patients we were unable to help. They died horrible deaths: howling and  
44 writhing in pain, gasping for air, suffocating and being terrified...To let even a  
45 few people die a horrible death is unacceptable and inhumane. Assisted suicide  
46 and euthanasia must be an [sic] options” (The National Post: July 22<sup>nd</sup>, 2011).  
47  
48  
49

## 50 INTERPRETATION

51  
52 Our data show that while Canadian professional bodies appear in the media as  
53 largely supporting a movement towards the legalization of euthanasia, individual  
54 physician voices are represented as largely opposed. The three predominant discourses  
55  
56  
57  
58  
59  
60

1  
2  
3 that recur include claims about the incommensurability of euthanasia with the basic  
4  
5 mission of medicine, a need to define end-of-life medical practices in order to  
6  
7  
8 disentangle the ethics of unique practices, and advocacy for the development of  
9  
10 palliative care.

11  
12  
13 Many physicians in our sample appear in the print media with a stated purpose  
14  
15 of clarifying ethical and practical distinctions between euthanasia and other medical  
16  
17 practices. This act of clarification can be read as an important contribution: better  
18  
19 conceptual clarity amongst the medical communities and general public will hopefully  
20  
21 lead to a more informed and productive debate. A critical analysis of how these  
22  
23 distinctions are drawn is necessary. For example, moral differences between euthanasia  
24  
25 and potentially life-shortening palliative treatment (e.g., pain relief and palliative  
26  
27 sedation) are often argued to hinge on whether the physician intends to cause death.  
28  
29 Moral differences between euthanasia and the withdrawal of life-sustaining treatment  
30  
31 are often argued to hinge on an inherent normative distinction between killing and  
32  
33 letting die (i.e., commission versus omission). Some have claimed that such distinctions  
34  
35 are unsustainable [4] and that they amount to “moral fictions:” motivated false beliefs  
36  
37 that justify established medical practices in light of prevailing moral norms [5]. While a  
38  
39 detailed ethical analysis of these ideas is beyond the scope of this article, any discourse  
40  
41 that characterizes euthanasia as absolutely unrelated to other potentially life-shortening  
42  
43 medical practices is an oversimplification, and thereby limits the public’s opportunity to  
44  
45 engage fully in an informed discussion about the ethics of hastened death.  
46  
47  
48  
49  
50  
51  
52  
53  
54  
55  
56  
57  
58  
59  
60

1  
2  
3 The idea that palliative care, as a discipline, opposes acquiescing to euthanasia  
4 requests is not new. Indeed, the very definition of palliative care includes a statement  
5 that it neither hastens nor postpones death [6]. In response to recent events in  
6 Canadian society concerning euthanasia, the Canadian Hospice Palliative Care  
7 Association urges that the discussion be refocused on how to improve access to quality  
8 end-of-life care for all Canadians [7]. In our sample, some palliative care physicians  
9 entered the media discussion expressly to convey this exact message. They also opted  
10 to use the media to communicate the inherently complex and multidimensional nature  
11 of desire for death in terminal illness. This is extremely important information. Indeed,  
12 for a productive discussion to occur about end-of-life care, the public, clinicians and  
13 policy makers need to understand that an expressed desire for hastened death by a  
14 patient can mean many different things [8-9]. Healthcare providers do their patients a  
15 disservice if they do not engage with the underlying meaning of a patient's apparent  
16 desire for death in order to understand where this feeling is coming from and what  
17 might be done to help them [10].

18  
19  
20  
21  
22  
23  
24  
25  
26  
27  
28  
29  
30  
31  
32  
33  
34  
35  
36  
37  
38  
39  
40  
41 In the data, some physicians take this claim one step further, espousing the idea  
42 that palliative care is a panacea; good palliative care obviates the relevance of  
43 euthanasia because of its potential to alleviate all suffering at the end of life. This stance  
44 is problematic in that it denies that suffering may persist for some patients despite the  
45 best that palliative care has to offer. There is thus cause for concern that this discourse  
46 can be interpreted as naïve or patronizing, thereby undermining the legitimacy of the  
47  
48  
49  
50  
51  
52  
53  
54  
55  
56  
57  
58  
59  
60

1  
2  
3 palliative care discipline as an authority and source of wisdom regarding the horizon of  
4  
5 therapeutic possibilities at the end of life.  
6  
7

8  
9 Our analysis does not make definitive claims about what physicians think about  
10  
11 euthanasia, nor even present a coherent understanding of its parameters and  
12  
13 definitions—the very definition of euthanasia remains a point of contention. Our  
14  
15 analysis is based on the portrayal of physicians within newspaper print media  
16  
17 representations shaped by actors located outside of the medical world (e.g., journalists,  
18  
19 newspaper editors). In fact, it is possible that the voices of physicians who support  
20  
21 euthanasia are underrepresented in the media due to fears about how their patients  
22  
23 and colleagues might respond to their opinions. These representations are read by the  
24  
25 media-consuming Canadian public and likely interpreted and understood as how  
26  
27 physicians as a group feel about euthanasia, with few ways for the public to construct  
28  
29 any counter narratives to this portrayal. Physicians, whose profession is considered to  
30  
31 be expert and authoritative on the matter of euthanasia, hold a privileged place in  
32  
33 society for swaying public opinion on this issue. Those vocal few who have engaged with  
34  
35 the media are *de facto* representing physicians on public contemporary debates on  
36  
37 medical aid in dying, in general, and euthanasia, in particular. It is vital for physicians to  
38  
39 be aware of this public debate, how they are being portrayed within it, and its potential  
40  
41 effects on impending changes to provincial and national policies. Although our analysis  
42  
43 shows the equivocal opinions of physicians on euthanasia, an even greater diversity of  
44  
45 opinions from within the medical community would enhance the debate and contribute  
46  
47 to the cultural and policy changes for Canada.  
48  
49  
50  
51  
52  
53  
54  
55  
56  
57  
58  
59  
60

## REFERENCES

1. Canadian Medical Association. MD views on euthanasia, assisted suicide vary widely: survey. Canadian Medical Association Bulletin 2013; 185(4):357.
2. O'Connor M, Payne, S. Discourse analysis: examining the potential for research in palliative care. Palliative Medicine 2006; 20(8):829-834.
3. Canadian Medical Association. 2014. Euthanasia and assisted suicide.
4. College des Medecins du Quebec. Physicians, appropriate care and the debate on euthanasia: a reflection. 2009 Oct. 16. Available from: <http://www.cmq.org/en/Medias/Profil/Commun/Nouvelles/2009/~media/208E2B537FB144FAAE33DEB458D3AA90.ashx?91027> (Accessed 2014 January 31).
5. Downie J. *Dying justice: a case for decriminalizing euthanasia & assisted suicide in Canada*. Toronto: University of Toronto Press; 2004.
6. Miller FG, Truog RD, Brock, DW. Moral fictions and medical ethics. Bioethics 2010;24(9):453-460.
7. WHO definition of palliative care. World Health Organization. Available from: <http://www.who.int/cancer/palliative/definition/en/> (Accessed 2014 January 29).
8. Canadian Hospice Palliative Care Association. Let's talk about hospice palliative care first. Available from: <http://www.chpca.net/hpcfirst> (Accessed 2014 January 29).
9. Coyle N, Sculco L. Expressed desire for hastened death in seven patients living with advanced cancer: a phenomenologic inquiry. Oncology Nursing Forum 2004;31(3):699-706.
10. Nissim R, Gagliese L, Rodin G. The desire for hastened death in individuals with advanced cancer: a longitudinal qualitative study. Social Science & Medicine 2009;69(2):165-171.
11. Monforte-Royo C, Villavicencio-Chavez C, Tomas-Sabado J, Mahtani-Chugani V, Balaguer A. What lies behind the wish to hasten death? A systematic review and meta-ethnography from the perspective of patients. PLoS ONE 2012;7(5):e37117.doi: 10.1371/journal.pone.0037117.
